# Supplementary material for: Restructuring a gold nanocatalyst by electrochemical treatment to recover its H2 evolution catalytic activity
Source: Royal Society of Chemistry journal article supplement (doi:10.1039/d1se00026h), 2021-01-01
Supplement: d1se00026h1.pdf [file d1se00026h1.pdf]

## Electronic Supplementary Information

### **Restructuring gold nanocatalyst by an electrochemical treatment to recover its excellent H<sub>2</sub>-evolving catalytic activity**

Tien Duc Tran,<sup>a</sup> Hoang Van Le,<sup>b</sup> Anh Duc Nguyen,<sup>a</sup> Ly Thi Le,<sup>a</sup> Thuy Thi Dieu Ung<sup>c</sup> and Phong Dinh Tran<sup>a\*</sup>

<sup>a</sup>University of Science and Technology of Hanoi, Vietnam Academy of Science and Technology, 18 Hoang Quoc Viet, Hanoi, Vietnam. Email: [tran-dinh.phong@usth.edu.vn](mailto:tran-dinh.phong@usth.edu.vn)

<sup>b</sup>Department of Physics and Technology, Thai Nguyen University of Sciences, Tan Thinh ward, Thai Nguyen, Vietnam

<sup>c</sup>Institute of Materials Science, Vietnam Academy of Science and Technology, 18 Hoang Quoc Viet, Hanoi, Vietnam

## Supplementary

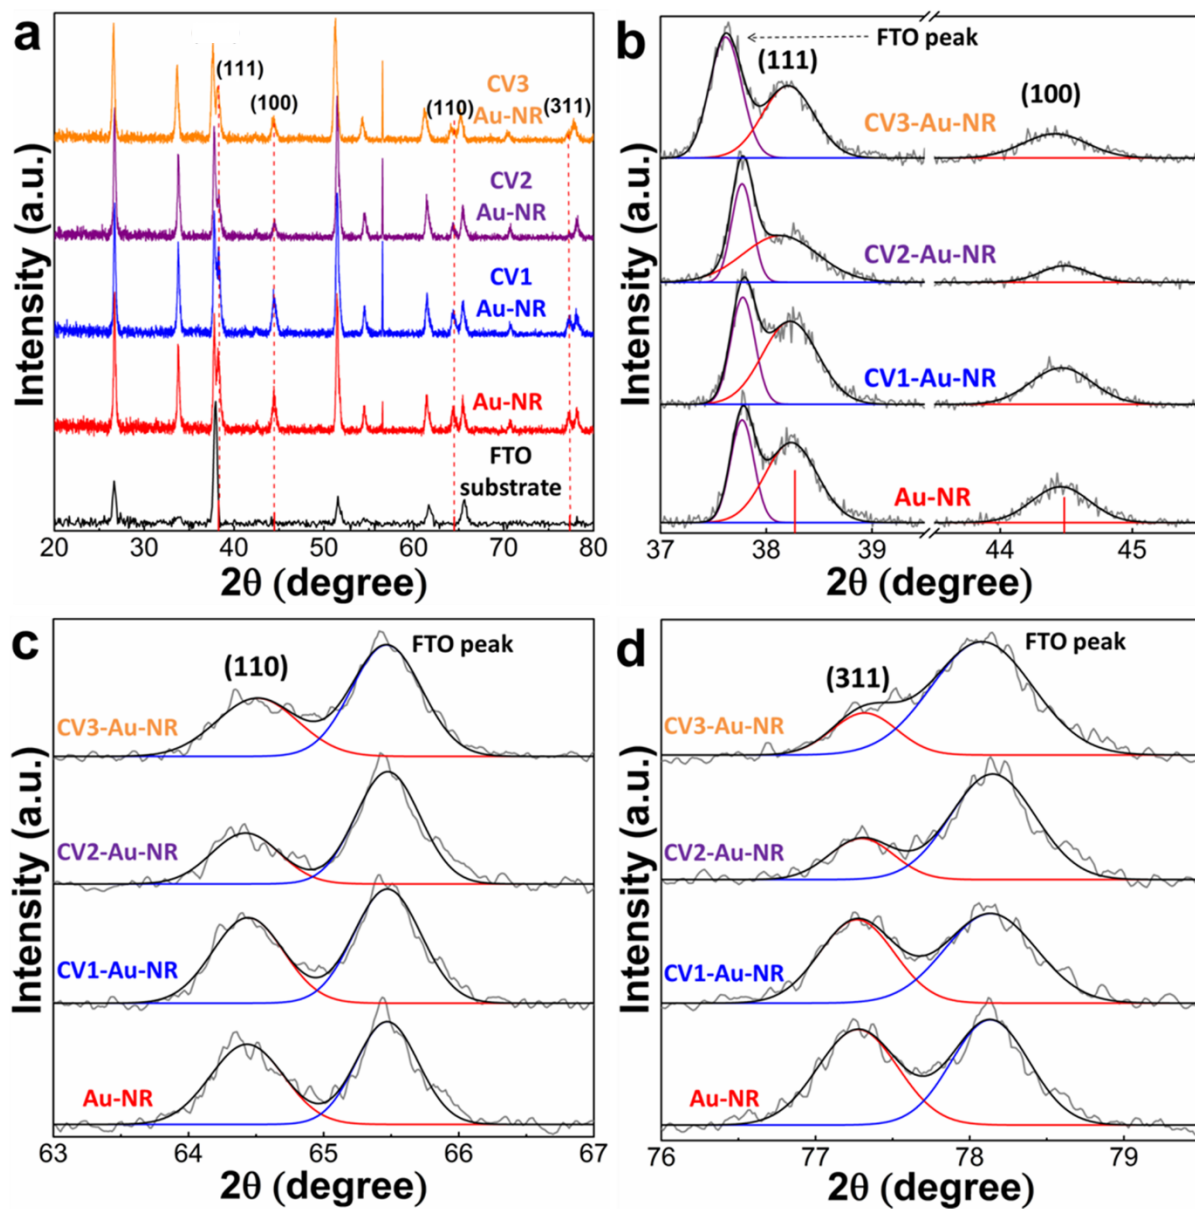

**Fig.S1.** XRD patterns of Au-NR (a) and fitting curves with different crystal planes of Au-NR catalysts (b, c, d).

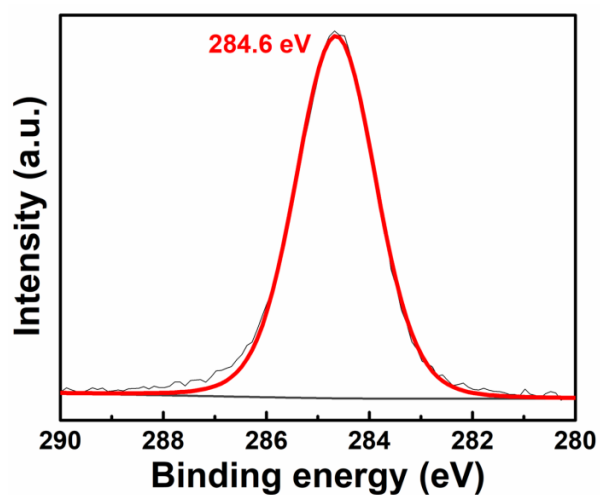

**Fig.S2.** XPS analysis (C1s core level) conducted on a CTAB-stabilized Au-NR sample

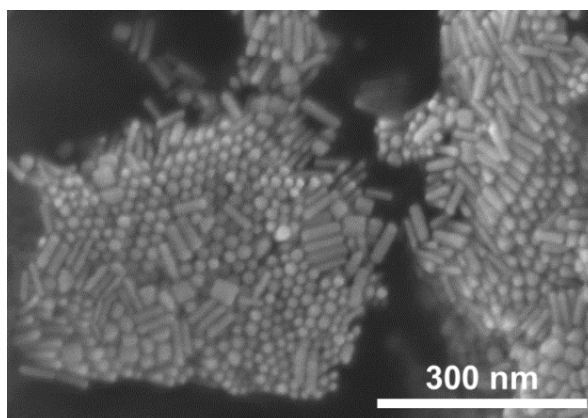

**Fig.S3.** SEM image of a CTAB-stabilized Au-NR catalyst electrode (loaded on FTO substrate)

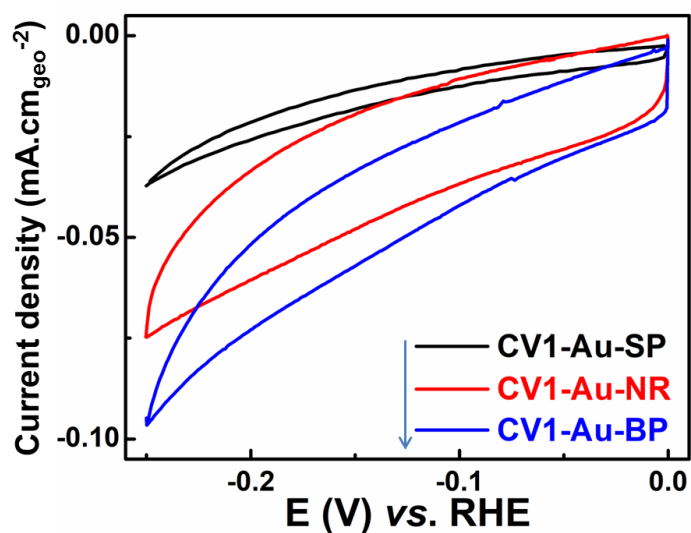

**Fig.S4.** The 1<sup>st</sup> cyclic voltammogram recorded for CTAB-stabilized Au-NR, Au-SP and Au-BP catalysts. 0.5 M H<sub>2</sub>SO<sub>4</sub> electrolyte solution. Potential scan rate of 50 mV s<sup>-1</sup>.

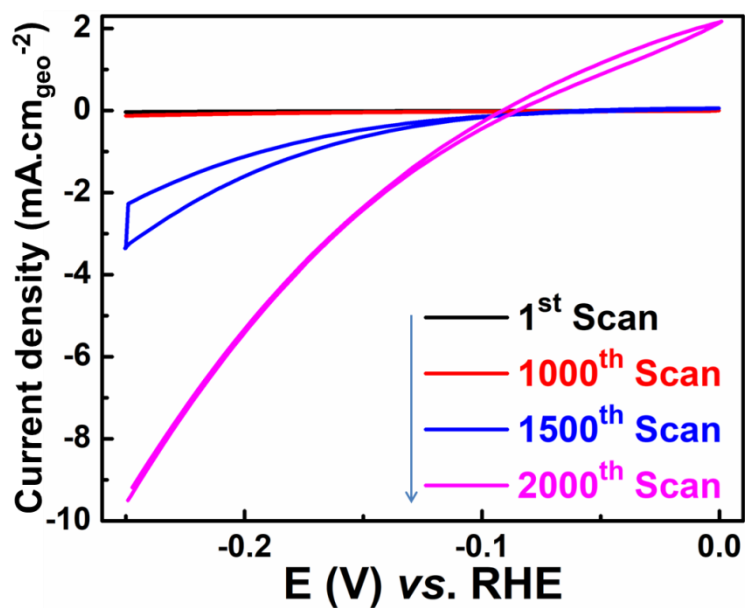

**Fig.S5.** Selected cyclic voltammograms recorded on the CTAB-stabilized Au-SP catalyst electrode immersed in a 0.5 M H<sub>2</sub>SO<sub>4</sub> electrolyte solution, potential scan rate of 50 mV s<sup>-1</sup>.

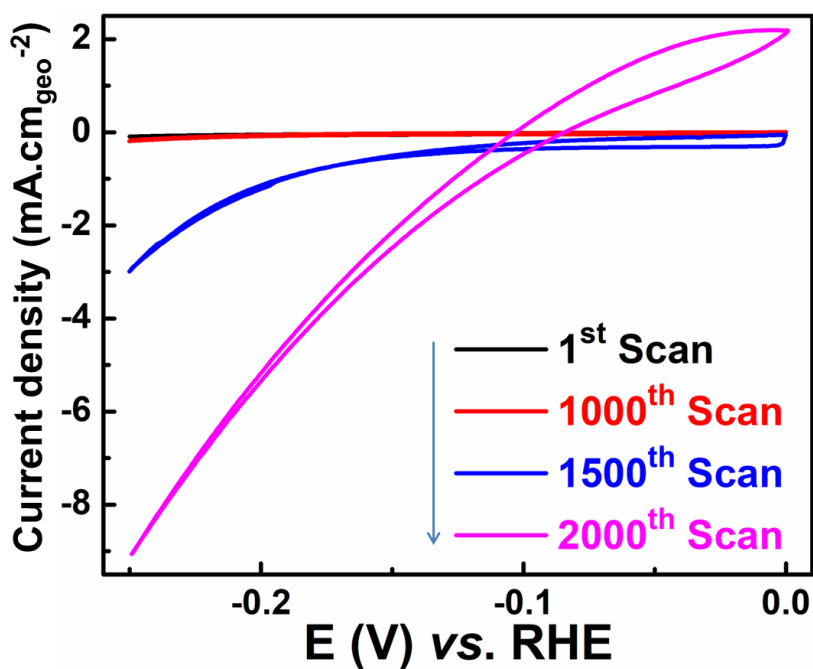

**Fig.S6.** Selected cyclic voltammograms recorded on the CTAB-stabilized Au-BP catalyst electrode immersed in a 0.5 M H<sub>2</sub>SO<sub>4</sub> electrolyte solution, potential scan rate of 50 mV s<sup>-1</sup>.

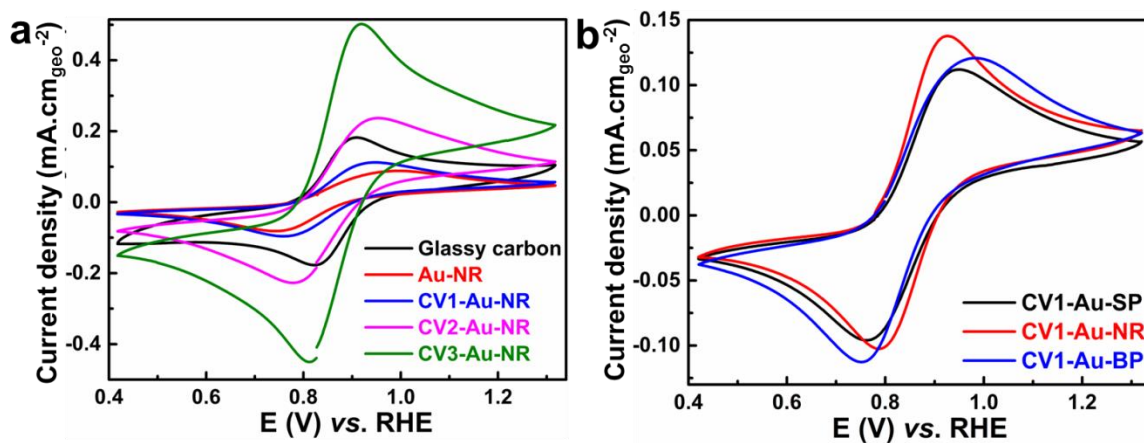

**Fig.S7.** Cyclic voltammograms of 1 mM  $K_3[Fe(CN)_6]/K_4[Fe(CN)_6]$  solution in pH 7 phosphate buffer (0.1 M) recorded on a glassy carbon or Au nanoparticles-coated FTO electrodes. Potential scan rate of  $20\text{ mV s}^{-1}$ .

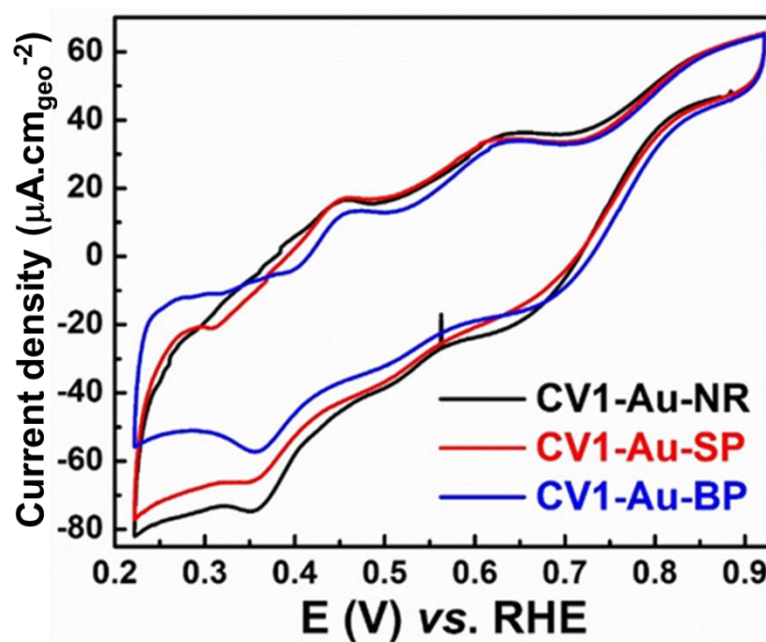

**Fig.S8.** Cyclic voltammograms recorded on CV1-Au-NR, CV1-Au-SP and CV1-Au-BP using 1 mM  $Pb(NO_3)_2$  solution in 0.1 M NaOH electrolyte. Potential scan rate of  $20\text{ mV s}^{-1}$ .

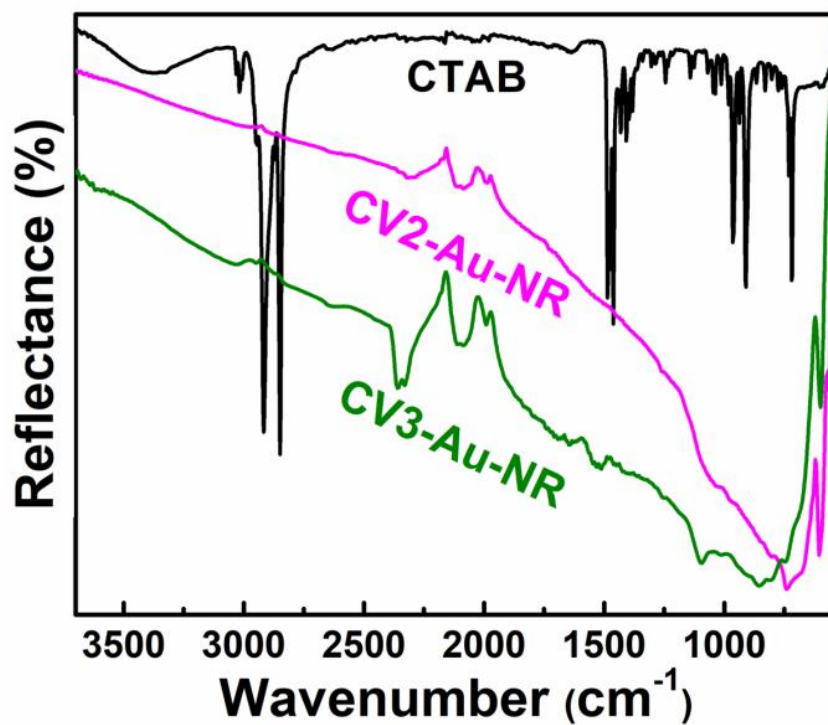

**Fig.S9.** FT-IR spectra of CV2-Au-NR, CV3-Au-NR samples and CTAB powder

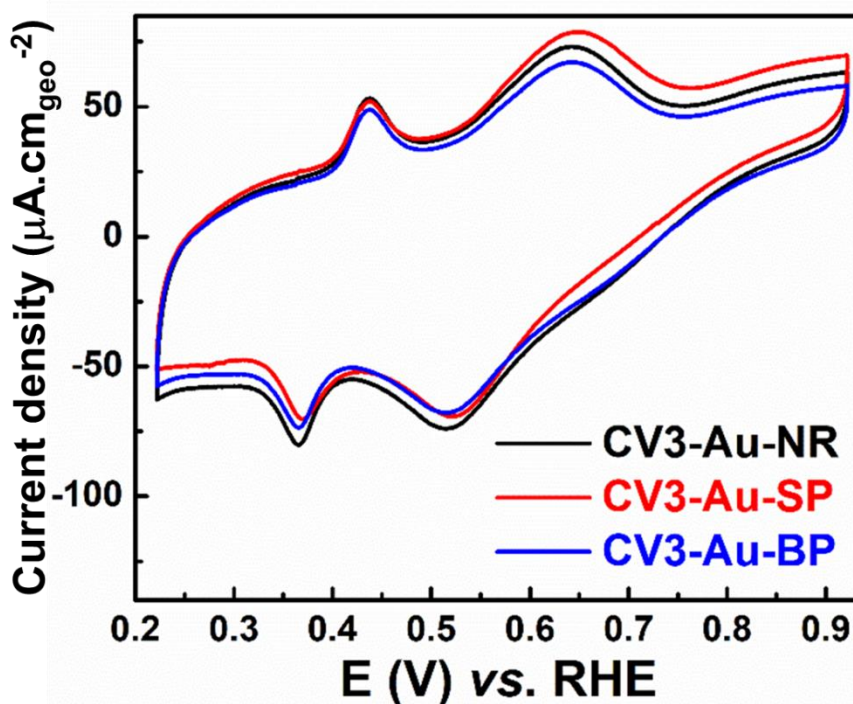

**Fig.S10.** Cyclic voltammograms recorded on CV3-Au-NR, CV3-Au-SP and CV3-Au-BP using 1mM  $\text{Pb}(\text{NO}_3)_2$  solution in 0.1 M NaOH electrolyte. Potential scan rate of  $20 \text{ mV s}^{-1}$ .

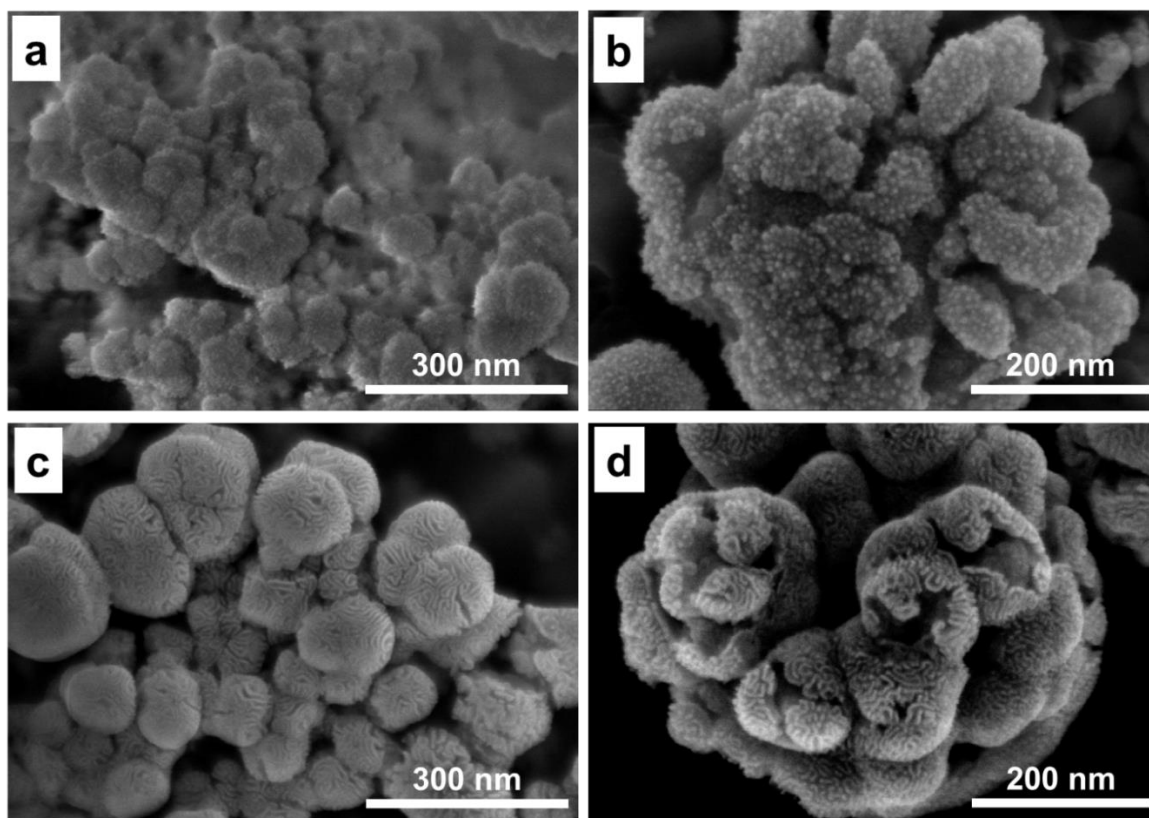

**Fig.S11.** SEM images of CV3-Au-BP (a, b) and CV3-Au-SP (c, d) samples

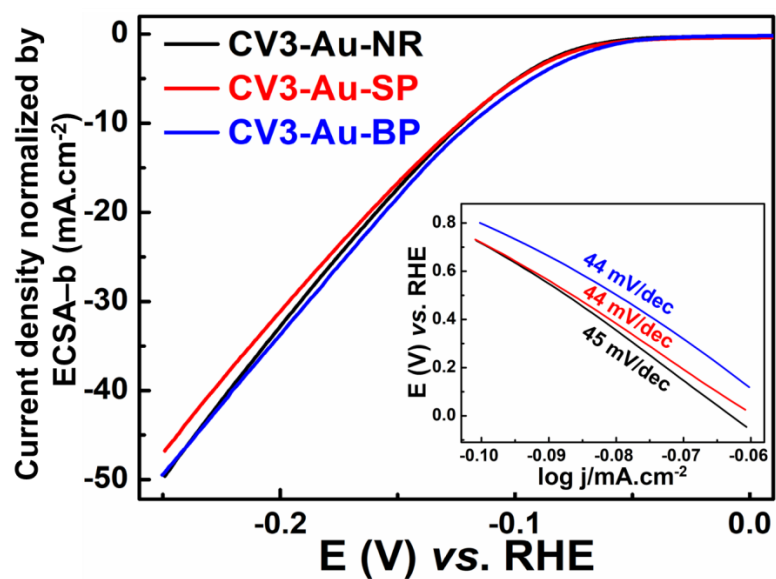

**Fig.S12.** I-V curves recorded on CV3-Au-NR, CV3-Au-SP and CV3-BP catalyst electrodes immersed in a 0.5M H<sub>2</sub>SO<sub>4</sub> electrolyte solution. Potential scan rate of 5 mV s<sup>-1</sup>. Current density is normalized by the relative electrochemical surface area of these electrodes.

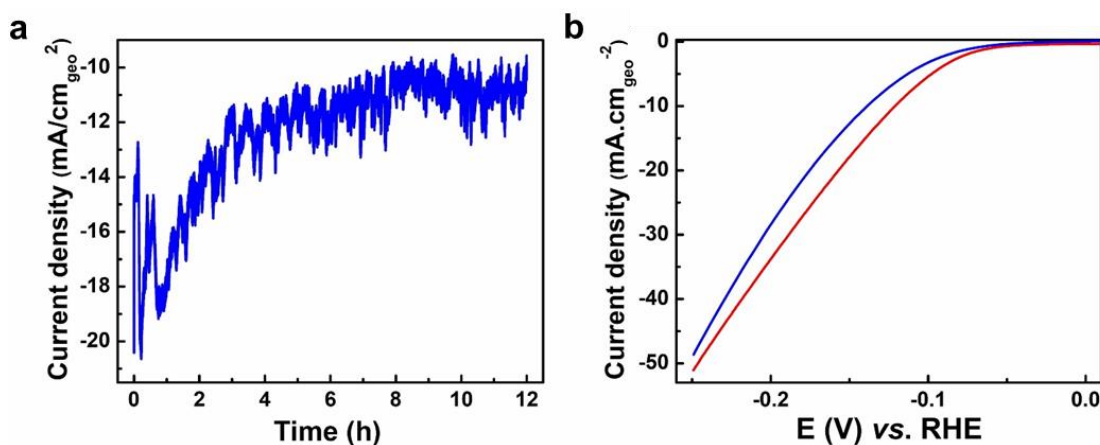

**Fig.S13.** I-t curve recorded on a CV3-Au-NR electrode at -0.15 V vs. RHE (a) and I-V curves recorded on the same CV3-Au-NR electrode before (*red trace*) and after (*blue trace*) being conditioned at -0.15 V vs. RHE for 12 hours (b). Electrolyte is a 0.5 M H<sub>2</sub>SO<sub>4</sub> solution.

**Table S1.** Crystalline size of various Au-NR facets and the proportion of peak intensities

| Sample    | Au(111)   |       | Au(100)   |       | Au(110)   |       | Au(311)   |      |
|-----------|-----------|-------|-----------|-------|-----------|-------|-----------|------|
|           | Size (nm) | Int.  | Size (nm) | Int.  | Size (nm) | Int.  | Size (nm) | Int. |
| Au-NR     | 14.505    | 4.216 | 16.721    | 1.909 | 14.702    | 1.224 | 16.661    | 1.0  |
| CV1-Au-NR | 13.644    | 4.449 | 15.712    | 1.953 | 15.194    | 1.271 | 17.869    | 1.0  |
| CV2-Au-NR | 9.937     | 5.885 | 19.773    | 2.076 | 15.881    | 1.854 | 20.709    | 1.0  |
| CV3-Au-NR | 14.637    | 8.011 | 15.017    | 2.682 | 13.296    | 2.005 | 20.611    | 1.0  |

Note: **Int.** represents relative peak intensity of Au facets



**Table S2.** H<sub>2</sub> evolution catalytic activity of some selected catalysts assayed in a 0.5 M H<sub>2</sub>SO<sub>4</sub> solution

| Entry | Catalyst                                               | Apparent catalytic activity                       |                                                                                   |                                                                              |                         |                                                                    | Reference |                                  |
|-------|--------------------------------------------------------|---------------------------------------------------|-----------------------------------------------------------------------------------|------------------------------------------------------------------------------|-------------------------|--------------------------------------------------------------------|-----------|----------------------------------|
|       |                                                        | Onset overpotential ( $\eta_{\text{onset}}$ , mV) | Overpotential to sustain 10 mA/cm <sub>geo</sub> <sup>2</sup> ( $\eta_{10}$ , mV) | Current density at 200 mV overpotential (mA/cm <sub>geo</sub> <sup>2</sup> ) | Tafel slope (mV/decade) | Catalyst loading amount ( $\mu\text{g}/\text{cm}_{\text{geo}}^2$ ) |           | TOF at 200 mV overpotential (/s) |
| 1     | CV1-Au-NR                                              | 110                                               | 230                                                                               | 6                                                                            | 57                      | 250                                                                | 0.10      | <i>This work</i>                 |
| 2     | CV1-Au-SP                                              | 110                                               | -                                                                                 | 3.5                                                                          | 59                      | 250                                                                | 0.06      | <i>This work</i>                 |
| 3     | CV1-Au-BP                                              | 110                                               | 245                                                                               | 4.0                                                                          | 58                      | 250                                                                | 0.07      | <i>This work</i>                 |
| 4     | CV2-Au-NR                                              | 50                                                | 169                                                                               | 14                                                                           | 52                      | 250                                                                | 0.23      | <i>This work</i>                 |
| 5     | CV2-Au-BP                                              | 50                                                | 170                                                                               | 14                                                                           | 51                      | 250                                                                | 0.23      | <i>This work</i>                 |
| 6     | CV2-Au-SP                                              | 50                                                | 180                                                                               | 13                                                                           | 51                      | 250                                                                | 0.21      | <i>This work</i>                 |
| 7     | CV3-Au-NR                                              | 50                                                | 120                                                                               | 34                                                                           | 45                      | 250                                                                | 0.56      | <i>This work</i>                 |
| 8     | CV3-Au-BP                                              | 50                                                | 120                                                                               | 34                                                                           | 44                      | 250                                                                | 0.56      | <i>This work</i>                 |
| 9     | CV3-Au-SP                                              | 50                                                | 125                                                                               | 33                                                                           | 44                      | 250                                                                | 0.54      | <i>This work</i>                 |
| 10    | Au-SP                                                  | 50                                                | 180                                                                               | 11                                                                           | 60                      | 350                                                                | 0.13      | [1]                              |
| 11    | Pt-Graphitic Tubes-FeCo/Cu                             | ~0                                                | 18                                                                                | -                                                                            | 24                      | 281.4                                                              | -         | [2]                              |
| 12    | Ru@C <sub>2</sub> N                                    | 10                                                | 22                                                                                | -                                                                            | 30                      | 285                                                                | -         | [3]                              |
| 13    | Dual atoms MoW/ N-doped Gr                             | ~0                                                | 24                                                                                | -                                                                            | 30                      | 823                                                                | -         | [4]                              |
| 14    | Laser-generated Ag NPs                                 | ~0                                                | 32                                                                                | 302                                                                          | 31                      | 200                                                                | -         | [5]                              |
| 15    | N-CoP <sub>2</sub>                                     | ~0                                                | 38                                                                                | >100                                                                         | 46                      | -                                                                  | -         | [6]                              |
| 16    | Cu <sub>0.075</sub> Co <sub>0.925</sub> P/Carbon paper | ~0                                                | 47                                                                                | >100                                                                         | 47                      | 5000                                                               | -         | [7]                              |
| 17    | Single atom Pt/N-doped Gr                              | ~0                                                | 50                                                                                | -                                                                            | 29                      | 76.5                                                               | -         | [8]                              |
| 18    | P-Fe <sub>2</sub> N/rGO                                | 22                                                | 64.8                                                                              | 70                                                                           | 49                      | 337                                                                | -         | [9]                              |
| 19    | MoSSe/CNTs                                             | 25                                                | 102                                                                               | -                                                                            | 38                      | 1760                                                               | -         | [10]                             |
| 20    | P-doped MoN                                            | 50                                                | 105                                                                               | >350                                                                         | 43                      | 200                                                                | -         | [11]                             |
| 21    | $\eta$ -MoC                                            | 30                                                | 122                                                                               | 60                                                                           | 53                      | 300                                                                | -         | [12]                             |
| 22    | CoP <sub>2</sub>                                       | 50                                                | 125                                                                               | 60                                                                           | 73                      | -                                                                  | -         | [6]                              |
| 23    | MoS <sub>x</sub> -2 $\mu\text{m}$ thick fim            | 125                                               | 129-140                                                                           | 100                                                                          | 48                      | -                                                                  | -         | [13]                             |
| 24    | MoS <sub>x</sub> -100 nm thick film                    | 150                                               | 175-189                                                                           | 70                                                                           | 35                      | -                                                                  | -         | [13]                             |
| 25    | a-WO <sub>x</sub> /WC                                  | 100                                               | 200                                                                               | 10                                                                           | 69                      | 320                                                                | -         | [14]                             |
| 26    | S-vacancy MoS <sub>2</sub> single layer                | 75                                                | 340                                                                               | 2.5                                                                          | -                       | -                                                                  | -         | [15]                             |

## References

1. T. D. Tran, M. T. T. Nguyen, H. V. Le, D. N. Nguyen, Q. D. Truong and P. D. Tran, *Chem. Commun.*, 2018, **54**, 3363-3366.
2. J. N. Tiwari, S. Sultan, C. W. Myung, T. Yoon, N. Li, M. Ha, A. M. Harzandi, H. J. Park, D. Y. Kim and S. S. Chandrasekaran, *Nat. Energy*, 2018, **3**, 773-782.
3. J. Mahmood, F. Li, S.-M. Jung, M. S. Okyay, I. Ahmad, S.-J. Kim, N. Park, H. Y. Jeong and J.-B. Baek, *Nat. Nanotechnol.*, 2017, **12**, 441-446.
4. Y. Yang, Y. Qian, H. Li, Z. Zhang, Y. Mu, D. Do, B. Zhou, J. Dong, W. Yan and Y. Qin, *Sci. Adv.*, 2020, **6**, eaba6586.
5. Z. Li, J.-Y. Fu, Y. Feng, C.-K. Dong, H. Liu and X.-W. Du, *Nat. Catal.*, 2019, **2**, 1107-1114.
6. J. Cai, Y. Song, Y. Zang, S. Niu, Y. Wu, Y. Xie, X. Zheng, Y. Liu, Y. Lin and X. Liu, *Sci. Adv.*, 2020, **6**, eaaw8113.
7. L. Yan, B. Zhang, J. Zhu, S. Zhao, Y. Li, B. Zhang, J. Jiang, X. Ji, H. Zhang and P. K. Shen, *J. Mater. Chem. A*, 2019, **7**, 14271-14279.
8. N. Cheng, S. Stambula, D. Wang, M. N. Banis, J. Liu, A. Riese, B. Xiao, R. Li, T.-K. Sham and L.-M. Liu, *Nat. Commun.*, 2016, **7**, 1-9.
9. P. Yu, L. Wang, Y. Xie, C. Tian, F. Sun, J. Ma, M. Tong, W. Zhou, J. Li and H. Fu, *Small*, 2018, **14**, 1801717.
10. J. Qiao, F. Song, J. Hu, D. Huo, J. Yuan, J. Shen, L. Niu and A.-j. Wang, *Int. J. Hydrogen Energy*, 2019, **44**, 16110-16119.
11. J. Yan, L. Kong, Y. Ji, Y. Li, J. White, S. Liu, X. Han, S.-T. Lee and T. Ma, *Commun. Chem.*, 2018, **1**, 95.
12. C. Tang, H. Zhang, K. Xu, Q. Zhang, J. Liu, C. He, L. Fan and T. Asefa, *J. Mater. Chem. A*, 2019, **7**, 18030-18038.
13. G. Giuffredi, A. Mezzetti, A. Perego, P. Mazzolini, M. Prato, F. Fumagalli, Y. C. Lin, C. Liu, I. N. Ivanov and A. Belianinov, *Small*, 2020, **16**, 2004047.
14. Y. Cui, X. Tan, K. Xiao, S. Zhao, N. M. Bedford, Y. Liu, Z. Wang, K.-H. Wu, J. Pan and W. H. Saputera, *ACS Energy Lett.*, 2020, **5**, 3560-3568.
15. C. Tsai, H. Li, S. Park, J. Park, H. S. Han, J. K. Nørskov, X. Zheng and F. Abild-Pedersen, *Nat. Commun.*, 2017, **8**, 1-8.
